# Supplementary material for: MiR-770-5p inhibits cisplatin chemoresistance in human ovarian cancer by targeting ERCC2
Source: PubMed Central journal article supplement (PMC5288183; doi:10.18632/oncotarget.10736), 2016-07-20
Supplement: oncotarget-07-53254-s001.pdf [file oncotarget-07-53254-s001.pdf]

## MiR-770-5p inhibits cisplatin chemoresistance in human ovarian cancer by targeting ERCC2

### Supplementary Materials

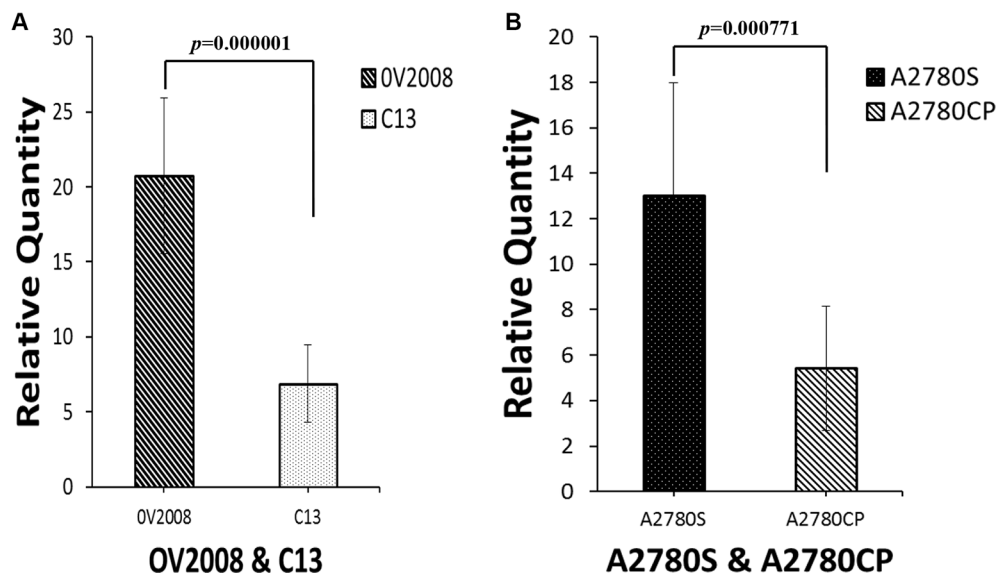

Supplementary Figure S1: In ovarian cancer cell lines, we also found that miR-770-5p expressions were all higher in cisplatin-sensitive parental cell lines (OV2008, A2780S) than their cisplatin-resistant variants (C13 and A2780CP), and  $p$ -values were 0.000001 and 0.000771, respectively ( $n = 10$  for all).

**Supplementary Table S1: Microarray data of miR-770-5p expression and statistical results between complete response (CR) and incomplete response (IR) ovarian cancer patients**

| miRNA ID         | DDCt_IR-CR   | P.Value_IR-CR | adj.P.Val_IR-CR |
|------------------|--------------|---------------|-----------------|
| hsa-let-7b*      | 5.099748187  | 3.71E-03      | 0.024288619     |
| hsa-let-7e*      | 2.645125438  | 3.20E-03      | 2.16E-02        |
| hsa-miR-130a     | 1.727257438  | 5.61E-03      | 3.24E-02        |
| hsa-miR-133a     | 4.288033521  | 2.94E-03      | 0.02044633      |
| hsa-miR-136*     | 3.118522688  | 3.90E-06      | 8.78E-04        |
| hsa-miR-141*     | 4.175896438  | 1.55E-03      | 1.41E-02        |
| hsa-miR-143      | 3.190906021  | 6.26E-04      | 1.41E-02        |
| hsa-miR-183*     | -2.048991896 | 8.05E-03      | 0.042126017     |
| hsa-miR-200b     | 5.331050104  | 5.12E-04      | 1.36E-02        |
| hsa-miR-214*     | 1.578972354  | 5.02E-03      | 3.08E-02        |
| hsa-miR-218-2*   | 7.706831854  | 1.39E-04      | 7.21E-03        |
| hsa-miR-219-1-3p | 6.655311021  | 1.56E-03      | 1.41E-02        |
| hsa-miR-335      | 2.345812104  | 8.17E-04      | 1.41E-02        |
| hsa-miR-335*     | 1.950726938  | 9.84E-03      | 4.71E-02        |
| hsa-miR-339-5p   | -3.030099479 | 2.58E-04      | 9.88E-03        |
| hsa-miR-34b*     | 4.106150854  | 7.15E-03      | 3.92E-02        |
| hsa-miR-34c-5p   | 3.746044354  | 9.25E-03      | 4.59E-02        |
| hsa-miR-376a     | 1.894456521  | 2.44E-03      | 1.79E-02        |
| hsa-miR-376c     | 2.368034188  | 1.98E-04      | 9.57E-03        |
| hsa-miR-379      | 1.855945521  | 6.36E-03      | 3.55E-02        |
| hsa-miR-380*     | 2.033712188  | 3.10E-04      | 9.98E-03        |
| hsa-miR-382      | 3.431527688  | 4.05E-03      | 2.60E-02        |
| hsa-miR-409-3p   | 6.827316854  | 8.47E-03      | 4.33E-02        |
| hsa-miR-411      | 1.962364771  | 1.96E-03      | 1.47E-02        |
| hsa-miR-433      | 2.398972688  | 1.35E-03      | 1.41E-02        |
| hsa-miR-452      | 2.324147354  | 5.53E-03      | 3.22E-02        |
| hsa-miR-455-5p   | 1.901040521  | 1.35E-03      | 1.41E-02        |
| hsa-miR-485-3p   | 2.329316521  | 9.67E-03      | 4.66E-02        |
| hsa-miR-493      | 2.507201521  | 2.21E-04      | 9.88E-03        |
| hsa-miR-508-3p   | 5.114927354  | 3.00E-03      | 2.07E-02        |
| hsa-miR-509-3p   | 4.157091438  | 5.18E-04      | 1.36E-02        |
| hsa-miR-513a-3p  | 2.114513188  | 4.83E-03      | 3.05E-02        |
| hsa-miR-539      | 2.069714854  | 8.38E-03      | 4.32E-02        |
| hsa-miR-542-3p   | 4.008906437  | 2.58E-03      | 1.86E-02        |
| hsa-miR-589*     | -1.357795396 | 6.27E-03      | 3.53E-02        |
| hsa-miR-597      | 1.464802438  | 5.12E-03      | 3.10E-02        |
| hsa-miR-770-5p   | 2.913104521  | 1.66E-06      | 8.78E-04        |
| hsa-miR-886-3p   | 1.862852021  | 7.47E-03      | 4.04E-02        |
| hsa-miR-886-5p   | 2.218379688  | 1.74E-03      | 1.41E-02        |
| hsa-miR-9        | -4.274845896 | 8.06E-05      | 5.05E-03        |
| hsa-miR-9*       | -3.257400396 | 5.23E-04      | 1.36E-02        |

The assay was found that 41 miRNAs were statistically different ( $p < 0.05$ ) between the groups, with 36 (87.8%) miRNAs higher in the complete response group and 5 miRNAs (12.2%, green word) higher in the incomplete response group. Three miRNAs exhibited even greater statistical significance ( $p < 0.0001$ , purple word for  $p$ -value) and of those, two were higher in the complete response group and one was higher in the incomplete response group. MiR-770-5p was the top differential miRNA of them (expression ratio of IR to CR = 2.9,  $p = 1.66E-06$ , adjust  $p$ -value =  $8.78E-04$ ).
